# Supplementary material for: The Broad Habitat Spectrum of the CL500-11 Lineage (Phylum Chloroflexi), a Dominant Bacterioplankton in Oxygenated Hypolimnia of Deep Freshwater Lakes
Source: Front Microbiol. 2018 Nov 27;9:2891. doi: 10.3389/fmicb.2018.02891 (PMC6277806; doi:10.3389/fmicb.2018.02891)
Supplement: Table S1 — List of the 60 sequences in the SILVA SSU 132 Parc database that perfectly match the probe CLGNS_584. Nucleotide identities to the two CL500-11 sequences in the SILVA SSU 132 Ref NR99 database (AF316759 and HM856384) are shown in the second and third columns. The other columns are retrieved from the output of the TestProbe 3.0 tool. [file Table_1.XLSX]

## Sheet: Supplementary Table 1
Accession No.	% idt. to AF316759	% idt. to HM856384	SILVA taxonomy	Organism name	Sequence length (bp)	Probe mismatch	Probe-matched E. coli position	Match direction	Sequence match
AB686531	99.29	99.64	Bacteria;Chloroflexi;Anaerolineae;Anaerolineales;Anaerolineaceae;uncultured;	uncultured Anaerolineae bacterium	562	0	584	rev	GGCGUGUAG-==================-CAUGAAAGC
AB781443	99.29	99.64	Bacteria;Chloroflexi;Anaerolineae;Anaerolineales;Anaerolineaceae;uncultured;	uncultured bacterium	562	0	584	rev	GGCGUGUAG-==================-CAUGAAAGC
AB831240	99.43	99.62	Bacteria;Chloroflexi;Anaerolineae;Anaerolineales;Anaerolineaceae;uncultured;	uncultured bacterium	525	0	584	rev	GGCGUGUAG-==================-CAUGAAAGC
AF316758	99.67	99.84	Bacteria;Chloroflexi;Anaerolineae;Anaerolineales;Anaerolineaceae;uncultured;	uncultured Crater Lake bacterium CL120-142	608	0	584	rev	GGCGUGUAG-==================-CAUGAAAGC
AF316759	100	95.85	Bacteria;Chloroflexi;Anaerolineae;Anaerolineales;Anaerolineaceae;uncultured;	uncultured Crater Lake bacterium CL500-11	1492	0	584	rev	GGCGUGUAG-==================-CAUGAAAGC
AF316760	99.38	99.52	Bacteria;Chloroflexi;Anaerolineae;Anaerolineales;Anaerolineaceae;uncultured;	uncultured Crater Lake bacterium CL500-27	643	0	584	rev	GGCGUGUAG-==================-CAUGAAAGC
AF316761	99.06	99.2	Bacteria;Chloroflexi;Anaerolineae;Anaerolineales;Anaerolineaceae;uncultured;	uncultured Crater Lake bacterium CL500-86	637	0	584	rev	GGCGUGUAG-==================-CAUGGAAGC
AJ965812	99.26	99.63	Bacteria;Chloroflexi;Anaerolineae;Anaerolineales;Anaerolineaceae;uncultured;	uncultured bacterium	542	0	584	rev	GGCGUGUAG-==================-CAUGAAAGC
AJ965858	99.08	99.45	Bacteria;Chloroflexi;Anaerolineae;Anaerolineales;Anaerolineaceae;uncultured;	uncultured bacterium	542	0	584	rev	GGCGUGUAG-==================-CAUGAAAGC
AJ965870	98.89	99.26	Bacteria;Chloroflexi;Anaerolineae;Anaerolineales;Anaerolineaceae;uncultured;	uncultured bacterium	542	0	584	rev	GGCGUGUAG-==================-CAUGAAAGC
AJ965898	99.26	99.63	Bacteria;Chloroflexi;Anaerolineae;Anaerolineales;Anaerolineaceae;uncultured;	uncultured bacterium	542	0	584	rev	GGCGUGUAG-==================-CAUGAAAGC
AJ966070	99.08	99.45	Bacteria;Chloroflexi;Anaerolineae;Anaerolineales;Anaerolineaceae;uncultured;	uncultured bacterium	542	0	584	rev	GGCGUGUAG-==================-CAUGAAAGC
AJ966118	99.63	100	Bacteria;Chloroflexi;Anaerolineae;Anaerolineales;Anaerolineaceae;uncultured;	uncultured bacterium	542	0	584	rev	GGCGUGUAG-==================-CAUGAAAGC
AJ966120	98.12	98.5	Bacteria;Chloroflexi;Anaerolineae;Anaerolineales;Anaerolineaceae;uncultured;	uncultured bacterium	542	0	584	rev	GGCGUGUAG-==================-CAUGAAAGC
AJ966121	98.71	99.08	Bacteria;Chloroflexi;Anaerolineae;Anaerolineales;Anaerolineaceae;uncultured;	uncultured bacterium	542	0	584	rev	GGCGUGUAG-==================-CAUGAAAGC
AJ966124	99.45	99.82	Bacteria;Chloroflexi;Anaerolineae;Anaerolineales;Anaerolineaceae;uncultured;	uncultured bacterium	542	0	584	rev	GGCGUGUAG-==================-CAUGAAAGC
AJ966228	99.08	99.45	Bacteria;Chloroflexi;Anaerolineae;Anaerolineales;Anaerolineaceae;uncultured;	uncultured bacterium	542	0	584	rev	GGCGUGUAG-==================-CAUGAAAGC
DQ501287	99.09	99.53	Bacteria;Chloroflexi;Anaerolineae;Anaerolineales;Anaerolineaceae;uncultured;	uncultured Thermomicrobia bacterium	655	0	584	rev	GGCGUGUAG-==================-CAUGAAAGC
GQ165424	97.54	97.55	Bacteria;Chloroflexi;Anaerolineae;Anaerolineales;Anaerolineaceae;uncultured;	uncultured bacterium	369	0	584	rev	GGCGUGUAG-==================-CAUGAAAGC
GQ165425	98.91	98.91	Bacteria;Chloroflexi;Anaerolineae;Anaerolineales;Anaerolineaceae;uncultured;	uncultured bacterium	369	0	584	rev	GGCGUGUAG-==================-CAUGAAAGC
HM446117	99.23	95.77	Bacteria;Chloroflexi;Anaerolineae;Anaerolineales;Anaerolineaceae;uncultured;	uncultured bacterium	1421	0	584	rev	GGCGUGUAG-==================-CAUGAAAGC
HM856384	95.85	100	Bacteria;Chloroflexi;Anaerolineae;Anaerolineales;Anaerolineaceae;uncultured;	uncultured Anaerolineaceae bacterium	1422	0	584	rev	GGCGUGUAG-==================-CAUGAAAGC
KM126934	98.37	98.9	Bacteria;Chloroflexi;Anaerolineae;Anaerolineales;Anaerolineaceae;uncultured;	uncultured bacterium	597	0	584	rev	GGCGUGUAG-==================-CAUGAAAGC
KM127050	99.47	99.82	Bacteria;Chloroflexi;Anaerolineae;Anaerolineales;Anaerolineaceae;uncultured;	uncultured bacterium	562	0	584	rev	GGCGUGUAG-==================-CAUGAAAGC
KM127454	98.06	98.24	Bacteria;Chloroflexi;Anaerolineae;Anaerolineales;Anaerolineaceae;uncultured;	uncultured bacterium	600	0	584	rev	GGCGUGUAG-==================-CAUGAAAGC
KM127725	99.09	99.46	Bacteria;Chloroflexi;Anaerolineae;Anaerolineales;Anaerolineaceae;uncultured;	uncultured bacterium	594	0	584	rev	GGCGUGUAG-==================-CAUGAAAGC
KM128229	98.57	98.93	Bacteria;Chloroflexi;Anaerolineae;Anaerolineales;Anaerolineaceae;uncultured;	uncultured bacterium	583	0	584	rev	GGCGUGUAG-==================-CAUGAAAGC
KM128510	99.62	99.81	Bacteria;Chloroflexi;Anaerolineae;Anaerolineales;Anaerolineaceae;uncultured;	uncultured bacterium	590	0	584	rev	GGCGUGUAG-==================-CAUGAAAGC
KM129378	97.64	98.16	Bacteria;Chloroflexi;Anaerolineae;Anaerolineales;Anaerolineaceae;uncultured;	uncultured bacterium	585	0	584	rev	GGCGUGUAG-==================-CAUGAAAGC
KM129433	99.11	99.47	Bacteria;Chloroflexi;Anaerolineae;Anaerolineales;Anaerolineaceae;uncultured;	uncultured bacterium	563	0	584	rev	GGCGUGUAG-==================-CAUGAAAGC
KM129742	99.11	99.47	Bacteria;Chloroflexi;Anaerolineae;Anaerolineales;Anaerolineaceae;uncultured;	uncultured bacterium	562	0	584	rev	GGCGUGUAG-==================-CAUGAAAGC
KM129851	98.37	98.55	Bacteria;Chloroflexi;Anaerolineae;Anaerolineales;Anaerolineaceae;uncultured;	uncultured bacterium	589	0	584	rev	GGCGUGUAG-==================-CAUGAAAGC
KM130415	99.47	99.82	Bacteria;Chloroflexi;Anaerolineae;Anaerolineales;Anaerolineaceae;uncultured;	uncultured bacterium	562	0	584	rev	GGCGUGUAG-==================-CAUGAAAGC
KM130564	98.39	98.75	Bacteria;Chloroflexi;Anaerolineae;Anaerolineales;Anaerolineaceae;uncultured;	uncultured bacterium	562	0	584	rev	GGCGUGUAG-==================-CAUGAAAGC
KM130706	99.03	99.23	Bacteria;Chloroflexi;Anaerolineae;Anaerolineales;Anaerolineaceae;uncultured;	uncultured bacterium	581	0	584	rev	GGCGUGUAG-==================-CAUGAAAGC
KM130725	99.09	99.45	Bacteria;Chloroflexi;Anaerolineae;Anaerolineales;Anaerolineaceae;uncultured;	uncultured bacterium	604	0	584	rev	GGCGUGUAG-==================-CAUGAAAGC
KM130915	98.58	98.93	Bacteria;Chloroflexi;Anaerolineae;Anaerolineales;Anaerolineaceae;uncultured;	uncultured bacterium	597	0	584	rev	GGCGUGUAG-==================-CAUGAAAGC
KM131422	98.76	99.11	Bacteria;Chloroflexi;Anaerolineae;Anaerolineales;Anaerolineaceae;uncultured;	uncultured bacterium	563	0	584	rev	GGCGUGUAG-==================-CAUGAAAGC
KM131498	99.45	99.82	Bacteria;Chloroflexi;Anaerolineae;Anaerolineales;Anaerolineaceae;uncultured;	uncultured bacterium	589	0	584	rev	GGCGUGUAG-==================-CAUGAAAGC
KM131589	98.04	98.4	Bacteria;Chloroflexi;Anaerolineae;Anaerolineales;Anaerolineaceae;uncultured;	uncultured bacterium	590	0	584	rev	GGCGUGUAG-==================-CAUGAAAGC
KM131600	99.11	99.29	Bacteria;Chloroflexi;Anaerolineae;Anaerolineales;Anaerolineaceae;uncultured;	uncultured bacterium	559	0	584	rev	GGCGUGUAG-==================-CAUGAAAGC
KM131747	99.11	99.47	Bacteria;Chloroflexi;Anaerolineae;Anaerolineales;Anaerolineaceae;uncultured;	uncultured bacterium	562	0	584	rev	GGCGUGUAG-==================-CAUGAAAGC
KM132018	98.93	99.29	Bacteria;Chloroflexi;Anaerolineae;Anaerolineales;Anaerolineaceae;uncultured;	uncultured bacterium	563	0	584	rev	GGCGCGUAG-==================-CAUGAAAGC
KM132059	99.29	99.64	Bacteria;Chloroflexi;Anaerolineae;Anaerolineales;Anaerolineaceae;uncultured;	uncultured bacterium	561	0	584	rev	GGCGUGUAG-==================-CAUGAAAGC
KM132071	99.47	99.82	Bacteria;Chloroflexi;Anaerolineae;Anaerolineales;Anaerolineaceae;uncultured;	uncultured bacterium	562	0	584	rev	GGCGUGUAG-==================-CAUGAAAGC
KM132649	98.94	99.29	Bacteria;Chloroflexi;Anaerolineae;Anaerolineales;Anaerolineaceae;uncultured;	uncultured bacterium	564	0	584	rev	GGCGUGUAG-==================-CAUGAAAGC
KM133024	98.17	98.53	Bacteria;Chloroflexi;Anaerolineae;Anaerolineales;Anaerolineaceae;uncultured;	uncultured bacterium	598	0	584	rev	GGCGUGUAG-==================-CAUGAAAGC
KM133342	98.06	98.41	Bacteria;Chloroflexi;Anaerolineae;Anaerolineales;Anaerolineaceae;uncultured;	uncultured bacterium	594	0	584	rev	GGCGUGUAG-==================-CAUGAAAGC
KM133652	98.55	99.08	Bacteria;Chloroflexi;Anaerolineae;Anaerolineales;Anaerolineaceae;uncultured;	uncultured bacterium	593	0	584	rev	GGCGUGUAG-==================-CAUGAAAGC
KM133681	95.68	95.86	Bacteria;Chloroflexi;Anaerolineae;Anaerolineales;Anaerolineaceae;uncultured;	uncultured bacterium	595	0	584	rev	GGCGUGUAG-==================-CAUGAAAGC
KM133706	97.49	98.34	Bacteria;Chloroflexi;Anaerolineae;Anaerolineales;Anaerolineaceae;uncultured;	uncultured bacterium	611	0	584	rev	GGCGUGUAG-==================-CAUGAAAGC
KM133837	98.75	98.93	Bacteria;Chloroflexi;Anaerolineae;Anaerolineales;Anaerolineaceae;uncultured;	uncultured bacterium	580	0	584	rev	GGCGUGUAG-==================-CAUGAAAGC
KM133848	99.11	99.29	Bacteria;Chloroflexi;Anaerolineae;Anaerolineales;Anaerolineaceae;uncultured;	uncultured bacterium	591	0	584	rev	GGCGUGUAG-==================-CAUGAAAGC
KM134157	98.93	99.29	Bacteria;Chloroflexi;Anaerolineae;Anaerolineales;Anaerolineaceae;uncultured;	uncultured bacterium	591	0	584	rev	GGCGUGUAG-==================-CAUGAAAGC
KM134348	98.17	98.53	Bacteria;Chloroflexi;Anaerolineae;Anaerolineales;Anaerolineaceae;uncultured;	uncultured bacterium	590	0	584	rev	GGCGUGUAG-==================-CAUGAAAGC
KM134744	98.4	98.75	Bacteria;Chloroflexi;Anaerolineae;Anaerolineales;Anaerolineaceae;uncultured;	uncultured bacterium	588	0	584	rev	GGCGUGUAG-==================-CAUGAAAGC
KM134930	99.45	99.82	Bacteria;Chloroflexi;Anaerolineae;Anaerolineales;Anaerolineaceae;uncultured;	uncultured bacterium	601	0	584	rev	GGCGUGUAG-==================-CAUGAAAGC
KM135170	99.11	99.29	Bacteria;Chloroflexi;Anaerolineae;Anaerolineales;Anaerolineaceae;uncultured;	uncultured bacterium	559	0	584	rev	GGCGUGUAG-==================-CAUGAAAGC
KM135217	99.07	99.08	Bacteria;Chloroflexi;Anaerolineae;Anaerolineales;Anaerolineaceae;uncultured;	uncultured bacterium	590	0	584	rev	GGCGUGUAG-==================-CAUGAAAGC
KM155534	98.93	99.29	Bacteria;Chloroflexi;Anaerolineae;Anaerolineales;Anaerolineaceae;uncultured;	uncultured bacterium	563	0	584	rev	GGCGUGUAG-==================-CAUGAAAGC
